# Supplementary material for: Implementation of a logic gate by chemically induced nitrogen and oxygen rich C-dots for the selective detection of fluoride ions
Source: Royal Society of Chemistry journal article supplement (doi:10.1039/c8nj02041h), 2018-01-01
Supplement: c8nj02041h1.pdf [file c8nj02041h1.pdf]

## Supporting Information

### Implementation of Logic Gate by Chemically Induced Nitrogen and Oxygen Rich C-dots for Selective Detection of Fluoride Ions

Shagun Kainth, Akansha Mehta, Amit Mishra and Soumen Basu\*

\*Corresponding author. E-mail address: soumen.basu@thapar.edu

School of Chemistry and Biochemistry, Thapar Institute of Engineering & Technology,  
Patiala-147004, India

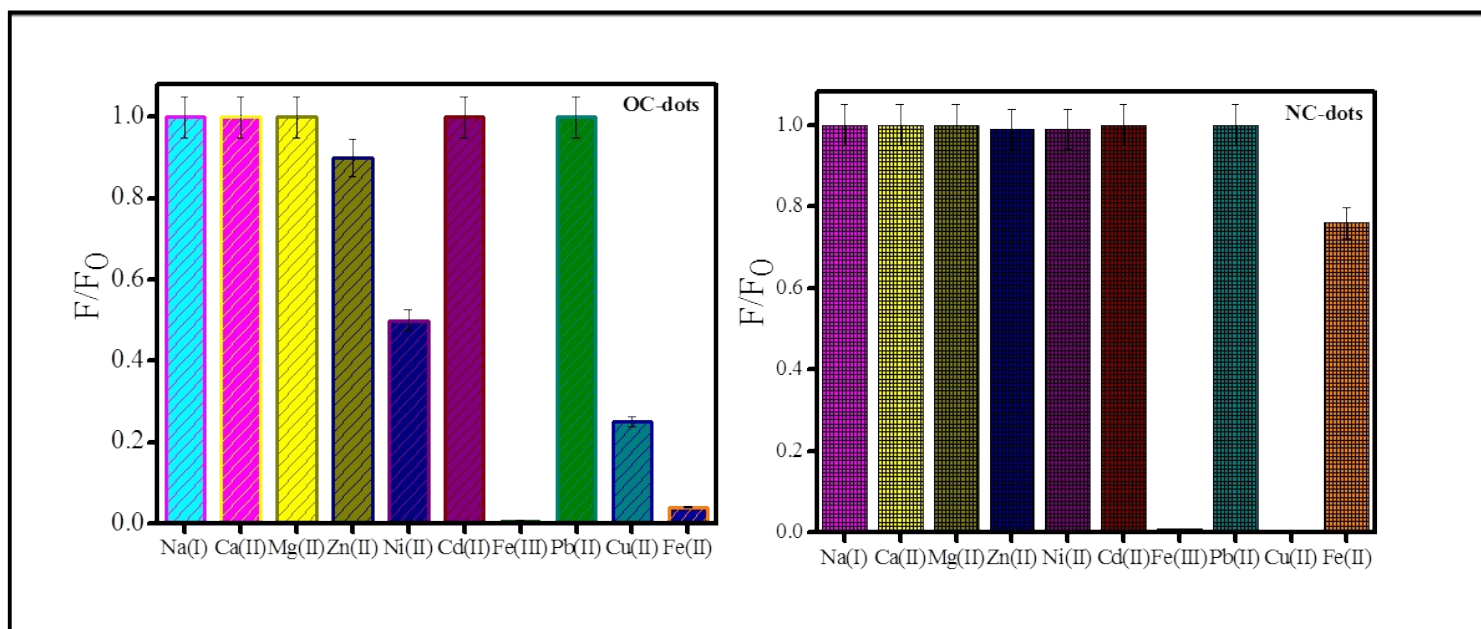

Fig. S1: Evaluation of fluorescence intensity for the selectivity of OC-dots/NC-dots towards different metal cations.

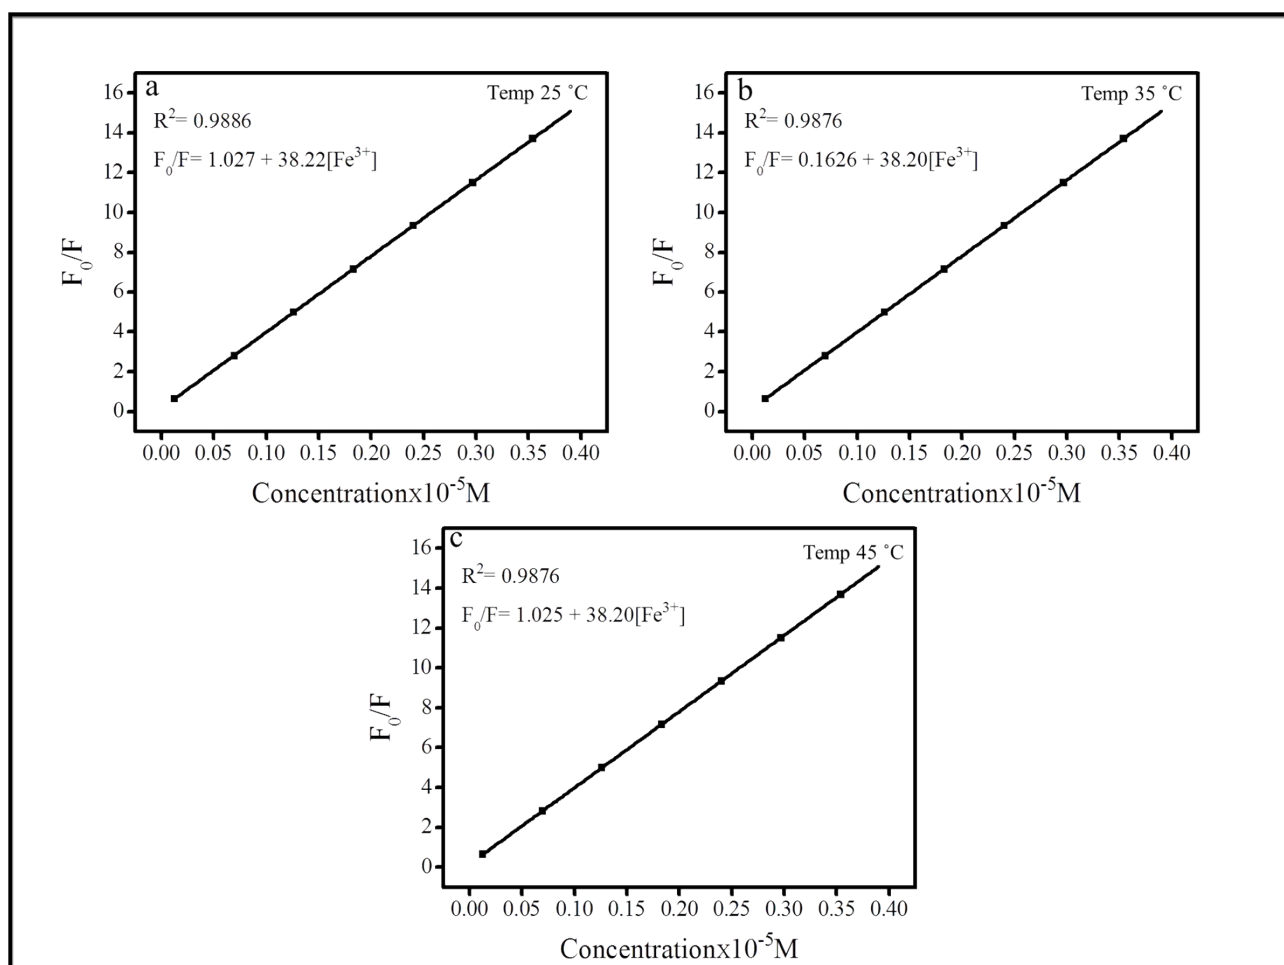

Fig. S2: Stern-Volmer plot  $F_0/F$  vs Quencher concentration ( $Fe^{3+}$  ions) at different temperature.

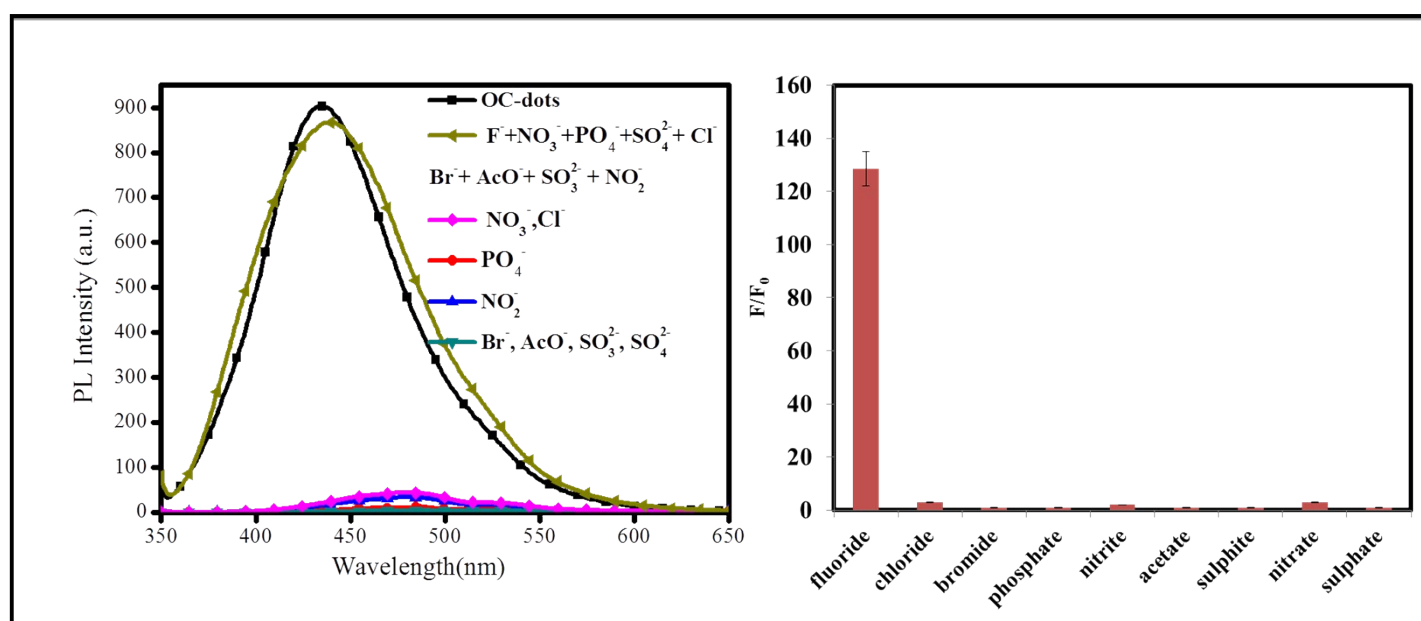

Fig. S3: Selectivity of OC-dots and ferric ion system towards different metal anions.
